# Supplementary material for: Flash glucose monitoring reduces glycemic variability and hypoglycemia: real-world data from Spain
Source: PubMed Central journal article supplement — BMJ Open Diabetes Res Care. 2020 Mar 19;8(1):e001052. doi: 10.1136/bmjdrc-2019-001052 (PMC7103828; doi:10.1136/bmjdrc-2019-001052), 2020-03-19

## SUPPLEMENTARY FILE

**Supplementary Figure 1.** Correlation between glycemic variability (glucose SD) and time in hypoglycemia (at or below 54 mg/dL) by 5%-bins of rank-ordered glucose SD.

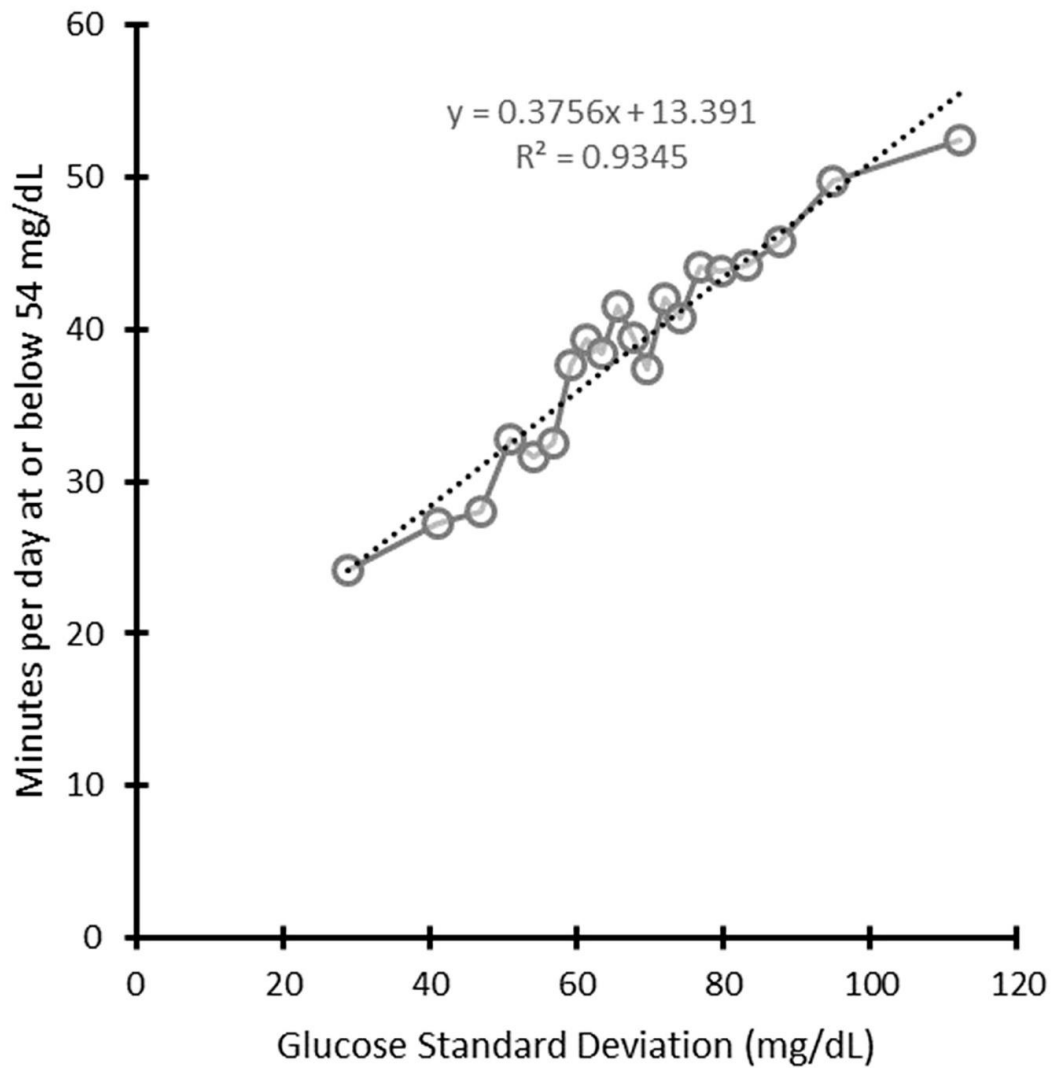

**Supplementary Figure 2.** Correlation between glycemic variability (glucose CV) and glucometrics by 5%-bins of rank-ordered glucose CV. Estimated HbA1c (A); time in hypoglycemia (below 70 mg/dL, B), time in hypoglycemia (at or below 54 mg/dL, C), time in range (hours per day within 70 to 180 mg/dL, D), and time in hyperglycaemia (hours per day above 180 mg/dL, E).

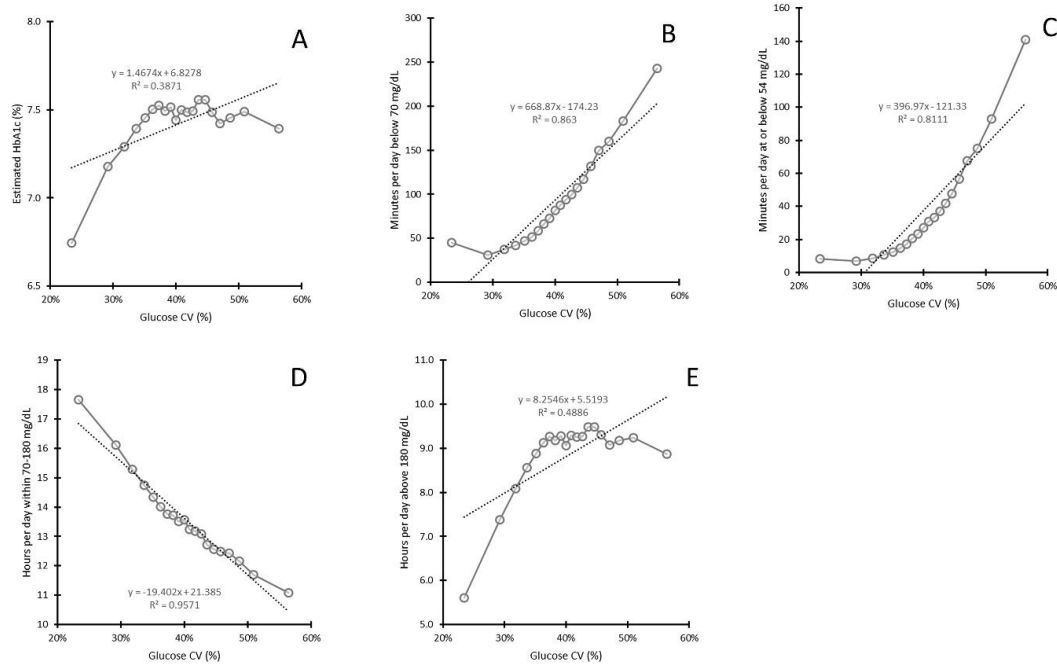

**Supplementary Figure 3.** Spanish (circles, solid) vs. worldwide (squares, dashed) glycemic variability (glucose CV) by daily scan groups. Mean values, error bars are 99.9% confidence intervals.

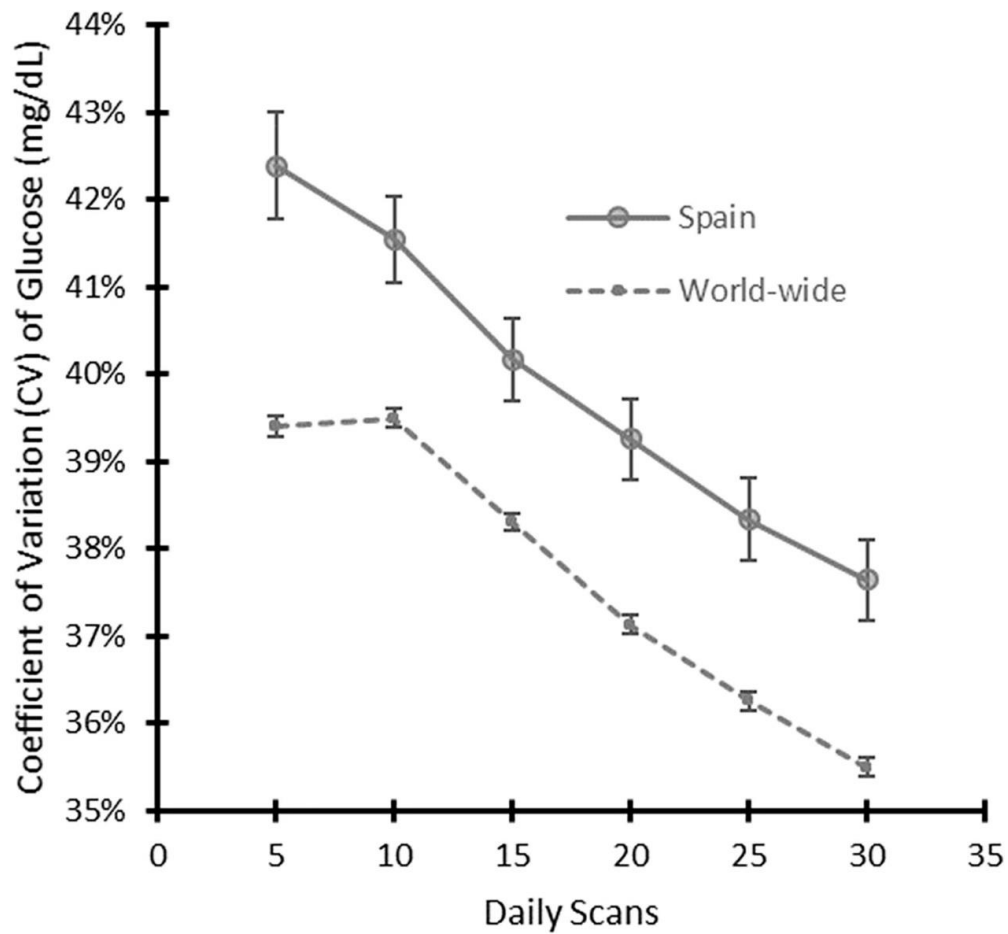

Supplement: bmjdrc-2019-001052supp001.pdf [file bmjdrc-2019-001052supp001.pdf]
